# Supplementary material
Source: publisher site journal article supplement (https://www.dovepress.com/article/275343)
Supplement: Supplementary file 1 [file get_supplementary_file.php]

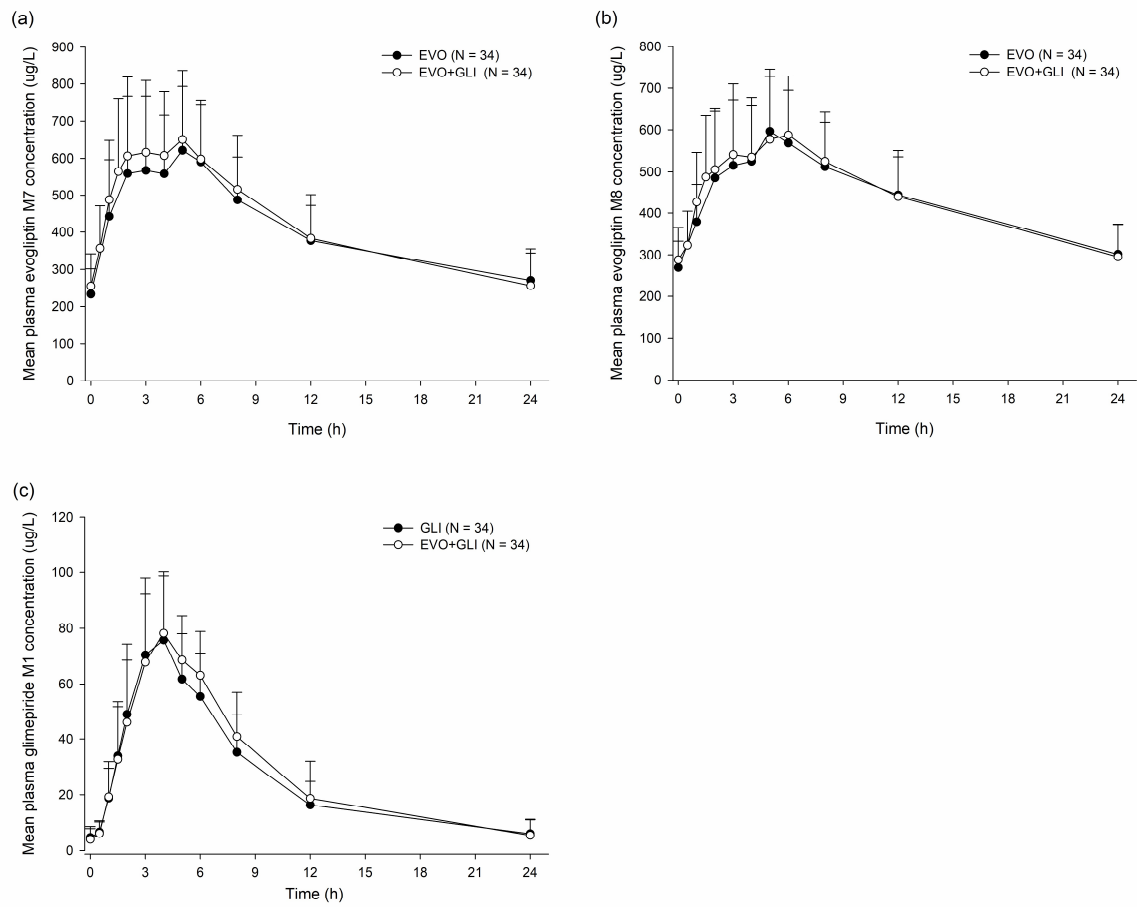

**Supplementary figure 1.** Mean plasma evogliptin M7 (a), evogliptin M8 (b), and glimepiride M1 (c) concentration-time profiles at steady-state after EVO, GLI or EVO+GLI administration. Error bars represent the standard deviations.
